# Supplementary material for: Staphylococcus aureus and Methicillin-Resistant Coagulase-Negative Staphylococci in Nostrils and Buccal Mucosa of Healthy Camels Used for Recreational Purposes
Source: MDPI journal article supplement (doi:10.3390/ani12101255), 2022-05-13
Supplement: s1 [file s1]

# ***Staphylococcus aureus* and Methicillin-Resistant Coagulase-Negative Staphylococci in Nostrils and Buccal Mucosa of Healthy Camels Used for Recreational Purposes**

Vanessa Silva, Manuela Caniça, Vera Manageiro, Newton Verbisck,  
María Teresa Tejedor-Junco, Margarita González-Martin, Juan Alberto Corbera,  
Patrícia Poeta and Gilberto Igrejas

**Table S1.** Distribution of staphylococci isolates according to the geographical location and anatomical isolation site.

| Animal   | Location      | Isolation Site | Isolate                        |
|----------|---------------|----------------|--------------------------------|
| Camel 1  | Fuerteventura | Nasal          | <i>S. aureus</i> (VS3145)      |
|          |               | Nasal          | <i>S. chromogenes</i> (VS3151) |
|          |               | Nasal          | <i>S. epidermidis</i> (VS3152) |
| Camel 2  | Gran Canaria  | Nasal          | <i>S. hominis</i> (VS3153)     |
|          |               | Nasal          | <i>S. lentus</i> (VS3155)      |
|          |               | Oral           | <i>S. lentus</i> (VS3166)      |
| Camel 3  | Gran Canaria  | Nasal          | <i>S. lentus</i> (VS3157)      |
| Camel 4  | Fuerteventura | Oral           | <i>S. lentus</i> (VS3154)      |
| Camel 5  | Gran Canaria  | Oral           | <i>S. lentus</i> (VS3156)      |
|          |               | Oral           | <i>S. aureus</i> (VS3140)      |
| Camel 6  | Gran Canaria  | Nasal          | <i>S. lentus</i> (VS3158)      |
|          |               | Nasal          | <i>S. sciuri</i> (VS3168)      |
| Camel 7  | Fuerteventura | Oral           | <i>S. lentus</i> (VS3159)      |
| Camel 8  | Fuerteventura | Oral           | <i>S. lentus</i> (VS3165)      |
| Camel 9  | Fuerteventura | Oral           | <i>S. lentus</i> (VS3162)      |
| Camel 10 | Fuerteventura | Oral           | <i>S. lentus</i> (VS3160)      |
| Camel 11 | Fuerteventura | Oral           | <i>S. lentus</i> (VS3161)      |
| Camel 12 | Fuerteventura | Oral           | <i>S. lentus</i> (VS3164)      |
| Camel 13 | Fuerteventura | Oral           | <i>S. lentus</i> (VS3163)      |
| Camel 14 | Gran Canaria  | Oral           | <i>S. sciuri</i> (VS3167)      |
| Camel 15 | Gran Canaria  | Oral           | <i>S. sciuri</i> (VS3170)      |
|          |               | Oral           | <i>S. aureus</i> (VS3141)      |
| Camel 16 | Gran Canaria  | Nasal          | <i>S. sciuri</i> (VS3169)      |
|          |               | Oral           | <i>S. aureus</i> (VS3142)      |
| Camel 17 | Fuerteventura | Nasal          | <i>S. sciuri</i> (VS3171)      |
|          |               | Oral           | <i>S. aureus</i> (VS3146)      |
| Camel 18 | Fuerteventura | Nasal          | <i>S. sciuri</i> (VS3172)      |
|          |               | Oral           | <i>S. sciuri</i> (VS3173)      |
| Camel 19 | Fuerteventura | Oral           | <i>S. sciuri</i> (VS3173)      |
| Camel 20 | Gran Canaria  | Nasal          | <i>S. sciuri</i> (VS3174)      |
| Camel 21 | Gran Canaria  | Nasal          | <i>S. sciuri</i> (VS3175)      |
|          |               | Oral           | <i>S. aureus</i> (VS3143)      |
| Camel 22 | Fuerteventura | Nasal          | <i>S. sciuri</i> (VS3176)      |
|          |               | Oral           | <i>S. aureus</i> (VS3144)      |
| Camel 23 | Fuerteventura | Nasal          | <i>S. sciuri</i> (VS3177)      |
|          |               | Oral           | <i>S. sciuri</i> (VS3178)      |
| Camel 24 | Fuerteventura | Oral           | <i>S. sciuri</i> (VS3178)      |
| Camel 25 | Fuerteventura | Nasal          | <i>S. xylosus</i> (VS3179)     |
| Camel 26 | Fuerteventura | Nasal          | <i>S. xylosus</i> (VS3180)     |
| Camel 27 | Fuerteventura | Oral           | <i>S. xylosus</i> (VS3181)     |
| Camel 28 | Fuerteventura | Nasal          | <i>S. aureus</i> (VS3148)      |
|          |               | Nasal          | <i>S. aureus</i> (VS3149)      |
| Camel 29 | Gran Canaria  | Nasal          | <i>S. aureus</i> (VS3150)      |
|          |               | Nasal          | <i>S. aureus</i> (VS3147)      |
| Camel 30 | Fuerteventura | Nasal          | <i>S. aureus</i> (VS3147)      |

**Table S2.** Primer pairs used for molecular typing and detection of antimicrobial resistance genes in staphylococci strains.

| Gene<br>(amplicon<br>size)  | Sequence (5' > 3')                                   | Conditions                                           | Reference |
|-----------------------------|------------------------------------------------------|------------------------------------------------------|-----------|
|                             |                                                      | 94 °C 5 min 1 cycle                                  |           |
| <i>mecA</i><br>(527 bp)     | F: GGGATCATAGCGTCATTATTC<br>R: AACGATTGTGACACGATAGCC | 94 °C 30 s<br>55 °C 30 s 30 cycles<br>72 °C 1 min    | [1]       |
|                             | F: CAGTTCACATGCCAAAGAG                               | 72 °C 10 min 1 cycle<br>94 °C 3 min 1 cycle          |           |
| <i>blaZ</i><br>(772 bp)     | R: TACACTCTTGGCGGTTTC                                | 94 °C 1 min<br>50 °C 1 min 30 cycles<br>72 °C 2 min  | [2]       |
|                             | F: TCTAAAAAGCATGTAAAAGAA                             | 72 °C 5 min 1 cycle                                  |           |
| <i>ermA</i><br>(645 bp)     | R: CTTGATAGTTTATTAATATTAG                            |                                                      | [2]       |
|                             | F: GAAAAGTACTCAACCAAATA                              | 93 °C 3 min 1 cycle                                  |           |
| <i>ermB</i><br>(639 bp)     | R: AGTAACGGTACTTAAATTGTTTA                           | 93 °C 1 min<br>52 °C 1 min 35 cycles<br>72 °C 1 min  | [3]       |
|                             | F: TCAAAAACATAATATAGATAAA                            | 72 °C 5 min 1 cycle                                  |           |
| <i>ermC</i><br>(642 bp)     | R: GCTAATATTGTTTAAATCGTCAAT                          |                                                      | [4]       |
|                             | F: CCGCCATTGAAATAGATCCT                              | 94 °C 3 min 1 cycle                                  |           |
| <i>ermT</i><br>(200 bp)     | R: TTCTGTAGCTGTGCTTTCAAAAA                           | 94 °C 1 min<br>55 °C 1 min 30 cycles<br>72 °C 1 min  | [5]       |
|                             | F: GCAAATGGTGTAGGTAAGACAAC                           | 72 °C 5 min 1 cycle<br>95 °C 3 min 1 cycle           |           |
| <i>msr(A/B)</i><br>(399 bp) | R: ATCATGTGATGTAAACAAAAT                             | 93 °C 30 s<br>55 °C 2 min 35 cycles<br>72 °C 1.5 min | [6]       |
|                             | F: ATGACTCGACATAATGAAAT                              | 72 °C 5 min 1 cycle<br>94 °C 3 min 1 cycle           |           |
| <i>mph(C)</i><br>(900 bp)   | R: CTACTCTTTCATACCTAACTC                             | 94 °C 1 min<br>45 °C 1 min 30 cycles<br>72 °C 1 min  | [2]       |
|                             |                                                      | 72 °C 5 min 1 cycle                                  |           |

|                            |                                                                                                            |                                                     |              |
|----------------------------|------------------------------------------------------------------------------------------------------------|-----------------------------------------------------|--------------|
|                            |                                                                                                            | 94 °C 2 min 1 cycle                                 |              |
| <i>lnu(A)</i><br>(323 bp)  | F: GGTGGCTGGGGGGTAGATGTATTAAGTGG<br>R: GCTTCTTTTGAAATACATGGTATTTTCGATC                                     | 94 °C 30 s<br>57 °C 30 s 30 cycles<br>72 °C 1 min   | [7]          |
|                            |                                                                                                            | 72 °C 10 min 1 cycle<br>94 °C 5 min 1 cycle         |              |
| <i>lnu(B)</i><br>(944 bp)  | F: CCTACCTATTGTTTGTGGAA<br>R: ATAACGTTACTCTCCTATTC                                                         | 94 °C 45 s<br>54 °C 45 s 30 cycles<br>72 °C 1 min   | [8]          |
|                            |                                                                                                            | 72 °C 5 min 1 cycle<br>94 °C 3 min 1 cycle          |              |
| <i>vga(A)</i><br>(1264 bp) | F: AGTGGTGGTGAAGTAACACG<br>R: GGTCAATACTCAATCGACTGAG                                                       | 94 °C 1 min<br>56 °C 1 min 30 cycles<br>72 °C 1 min | [9]          |
|                            |                                                                                                            | 72 °C 5 min 1 cycle<br>94 °C 1 min 1 cycle          |              |
| <i>vga(B)</i><br>(576 pb)  | F: TGACAATATGAGTGGTGGTG<br>R: GCGACCATGAAATTGCTCTC                                                         | 94 °C 1 min<br>55 °C 2 min 30 cycles<br>72 °C 2 min | [10]         |
|                            |                                                                                                            | 72 °C 10 min 1 cycle<br>94 °C 3 min 1 cycle         |              |
| <i>fusB</i><br>(431 bp)    | F: CTATAATGATATTAATGAGATTTTGG<br>R: TTTTACATATTGACCATCCGAATTGG                                             | 94 °C 30 s<br>57 °C 30 s 25 cycles<br>72 °C 45 s    | [11]         |
| <i>fusC</i><br>(332 bp)    | F: TTAAAGAAAAAGATATTGATATCTCGG<br>R: TTTACAGAATCCTTTTACTTTATTTGG                                           | 72 °C 7 min 1 cycle                                 |              |
| <i>fusD</i><br>(456 bp)    | F: AATTCGGTCAACGATCCC<br>R: GCCATCATTGCCAGTACG<br>F: CTGATTACTATCCAAGAAATTCGATTG                           |                                                     | [12]<br>[13] |
| <i>hla</i>                 | R: CTTTCCAGCCTACTTTTTTATCAGT<br>F: GTGCACTTACTGACAATAGTGC                                                  |                                                     | [13]         |
| <i>hlb</i>                 | R: GTTGATGAGTAGCTACCTTCAGT<br>F: ACTGTAGGAGCTAGTGCATTTGT                                                   | 94 °C 7 min 1 cycle                                 |              |
| <i>eta</i><br>(190 bp)     | R: TGGATACTTTTGTCTATCTTTTTCATCAAC                                                                          | 94 °C 30 s<br>57 °C 30 s 30 cycles<br>72 °C 30 s    | [13]<br>[13] |
| <i>etb</i><br>(612 bp)     | F: CAGATAAAGAGCTTTATACACACATTAC<br>R: AGTGAACCTTATCTTTCTATTGAAAAACACTC<br>F: TTCCTATTTGTAAAAGTGTGACACCCACT | 72 °C 10 min 1 cycle                                |              |
| <i>tst</i><br>(180 bp)     | R: TACTAATGAATTTTTTTATCGTAAGCCCTT                                                                          |                                                     | [13]         |

|                                      |                                                                                                  |                                    |      |
|--------------------------------------|--------------------------------------------------------------------------------------------------|------------------------------------|------|
| <i>lukF/lukS</i> -<br>PV<br>(443 bp) | F: ATCATTAGGTAAAATGTCTGGACATGATCCA<br>R: GCATCAAGTGTATTGGATAGCAAAAGC<br>F: AGCACAAGCTTGCCAACATCG | 95 °C 3 min 1 cycle                | [14] |
| <i>scn</i><br>(257 bp)               | R: TTAATATTACTTTTTAGTGC<br>F: TTTACTTTTGAACCGTTTCCTAC                                            | 94 °C 30 s<br>53 °C 30 s 30 cycles | [15] |
| <i>chp</i><br>(366 bp)               | R: CGTCCTGAATTCTTAGTATGCATATTCATTAG<br>F: AAGGCGATGACGCGAGTTAT                                   | 72 °C 2 min                        | [15] |
| <i>sak</i><br>(223 bp)               | R: GCGCTTGGATCTAATTCAAC<br>F: AGATCATTCGTGGTATAACG                                               | 72 °C 6 min 1 cycle                | [15] |
| <i>sea</i><br>(344 bp)               | R: TTAACCGAAGGTTCTGTAGA<br>F: AATCATAACCAACCGAATCA                                               |                                    | [15] |
| <i>sep</i><br>(196 bp)               | R: TCATAATGGAAGTGCTATAA                                                                          |                                    | [15] |

## References

1. Zhang, K.; Sparling, J.; Chow, B.L.; Elsayed, S.; Hussain, Z.; Church, D.L.; Gregson, D.B.; Louie, T.; Conly, J.M. New quadriplex PCR assay for detection of methicillin and mupirocin resistance and simultaneous discrimination of *Staphylococcus aureus* from coagulase-negative staphylococci. *J. Clin. Microbiol.* **2004**, *42*, 4947–4955, doi:10.1128/JCM.42.11.4947-4955.2004.
2. Schnellmann, C.; Gerber, V.; Rossano, A.; Jaquier, V.; Panchaud, Y.; Doherr, M.G.; Thomann, A.; Straub, R.; Perreten, V. Presence of New *mecA* and *mph(C)* Variants Conferring Antibiotic Resistance in *Staphylococcus* spp. Isolated from the Skin of Horses before and after Clinic Admission. *J. Clin. Microbiol.* **2006**, *44*, 4444–4454, doi:10.1128/JCM.00868-06.
3. Shopsis, B.; Mathema, B.; Alcabes, P.; Said-Salim, B.; Lina, G.; Matsuka, A.; Martinez, J.; Kreiswirth, B.N. Prevalence of *agr* specificity groups among *Staphylococcus aureus* strains colonizing children and their guardians. *J. Clin. Microbiol.* **2003**, *41*, 456–459, doi:10.1128/JCM.41.1.456-459.2003.
4. Sutcliffe, J.; Grebe, T.; Tait-Kamradt, A.; Wondrack, L. Detection of erythromycin-resistant determinants by PCR. *Antimicrob. Agents Chemother.* **1996**, *40*, 2562–2566, doi:10.1128/AAC.40.11.2562.
5. Gómez-Sanz, E.; Torres, C.; Lozano, C.; Fernández-Pérez, R.; Aspiroz, C.; Ruiz-Larrea, F.; Zarazaga, M. Detection, Molecular Characterization, and Clonal Diversity of Methicillin-Resistant *Staphylococcus aureus* CC398 and CC97 in Spanish Slaughter Pigs of Different Age Groups. *Foodborne Pathog. Dis.* **2010**, *7*, 1269–1277, doi:10.1089/fpd.2010.0610.
6. Wondrack, L.; Massa, M.; Yang, B. V.; Sutcliffe, J. Clinical strain of *Staphylococcus aureus* inactivates and causes efflux of macrolides. *Antimicrob. Agents Chemother.* **1996**, *40*, 992–998.
7. Lina, G.; Quaglia, A.; Reverdy, M.E.; Leclercq, R.; Vandenesch, F.; Etienne, J. Distribution of genes encoding resistance to macrolides, lincosamides, and streptogramins among staphylococci. *Antimicrob. Agents Chemother.* **1999**, *43*, 1062–1066, doi:10.1128/AAC.43.5.1062.
8. Bozdogan, B.; Berrezouga, L.; Kuo, M.S.; Yurek, D.A.; Farley, K.A.; Stockman, B.J.; Leclercq, R. A new resistance gene, *linB*, conferring resistance to lincosamides by nucleotidylation in *Enterococcus faecium* HM1025. *Antimicrob. Agents Chemother.* **1999**, *43*, 925–929.

9. Lozano, C.; Aspiroz, C.; Rezusta, A.; Gómez-Sanz, E.; Simon, C.; Gómez, P.; Ortega, C.; Revillo, M.J.; Zarazaga, M.; Torres, C. Identification of novel vga (A)-carrying plasmids and a Tn5406-like transposon in methicillin-resistant *Staphylococcus aureus* and *Staphylococcus epidermidis* of human and animal origin. *Int. J. Antimicrob. Agents* **2012**, *40*, 306–312.
10. Hammerum, A.M.; Jensen, L.B.; Aarestrup, F.M. Detection of the *satA* gene and transferability of virginiamycin resistance in *Enterococcus faecium* from food-animals. *FEMS Microbiol. Lett.* **1998**, *168*, 145–151, doi:10.1111/j.1574-6968.1998.tb13267.x.
11. McLaws, F.; Chopra, I.; O'Neill, A.J. High prevalence of resistance to fusidic acid in clinical isolates of *Staphylococcus epidermidis*. *J. Antimicrob. Chemother.* **2008**, *61*, 1040–1043, doi:10.1093/jac/dkn071.
12. Chen, H.-J.; Hung, W.-C.; Tseng, S.-P.; Tsai, J.-C.; Hsueh, P.-R.; Teng, L.-J. Fusidic acid resistance determinants in *Staphylococcus aureus* clinical isolates. *Antimicrob. Agents Chemother.* **2010**, *54*, 4985–4991, doi:10.1128/AAC.00523-10.
13. Jarraud, S.; Mougél, C.; Thioulouse, J.; Lina, G.; Meugnier, H.; Forey, F.; Etienne, J.; Vandenesch, F.; Nesme, X. Relationships between *Staphylococcus aureus* Genetic Background, Virulence Factors, *agr* Groups (Alleles), and Human Disease. *Infect. Immun.* **2002**, *70*, 631–641, doi:10.1128/IAI.70.2.631.
14. Lina, G.; Piemont, Y.; Godail-Gamot, F.; Bes, M.; Peter, M.-O.; Gauduchon, V.; Vandenesch, F.; Etienne, J. Involvement of Panton-Valentine Leukocidin - Producing *Staphylococcus aureus* in Primary Skin Infections and Pneumonia. *Clin. Infect. Dis.* **1999**, *29*, 1128–1132, doi:10.1086/313461.
15. van Wamel, W.J.B.; Rooijackers, S.H.M.; Ruyken, M.; van Kessel, K.P.M.; van Strijp, J.A.G. The innate immune modulators staphylococcal complement inhibitor and chemotaxis inhibitory protein of *Staphylococcus aureus* are located on beta-hemolysin-converting bacteriophages. *J. Bacteriol.* **2006**, *188*, 1310–1315, doi:10.1128/JB.188.4.1310-1315.2006.
